# Supplementary material for: In situ ion-exchange synthesis of SnS2/g-C3N4 nanosheets heterojunction for enhancing photocatalytic activity
Source: Royal Society of Chemistry journal article supplement (doi:10.1039/c5ra21506d), 2016-01-01
Supplement: c5ra21506d1.pdf [file c5ra21506d1.pdf]

## ELECTRONIC SUPPLEMENTARY INFORMATION

### **In Situ Ion-Exchange Synthesis of SnS<sub>2</sub>/g-C<sub>3</sub>N<sub>4</sub> Nanosheets Heterojunction for Enhancing Photocatalytic Activity**

Yongping Liu<sup>a,b</sup>, Peng Chen<sup>b</sup>, Yuan Chen<sup>b</sup>, Huidan Lu<sup>\*,a,b</sup>, Jixiang Wang<sup>b</sup>, Zhishu Yang<sup>b</sup>, Zhenhuan Lu<sup>\*,a,b</sup>, Ming Li<sup>a,b</sup>, and Liang Fang<sup>c</sup>

<sup>a</sup> *Guangxi Key Laboratory of Electrochemical and Magneto-chemical Functional Materials, Guilin University of Technology, Guilin, P.R. China.*

<sup>b</sup> *College of Chemistry and Bioengineering, Guilin University of Technology, Guilin, P.R. China*

<sup>c</sup> *State Key Laboratory Breeding Base of Nonferrous Metals and Specific Materials Processing, Guilin University of Technology, Guilin 541004, P.R. China*

\*Corresponding author Tel./fax: +86 0773 5898551.

E-mail: [lhuidanl@163.com](mailto:lhuidanl@163.com) (Huidan Lu), [zhenhuanlu@glut.edu.cn](mailto:zhenhuanlu@glut.edu.cn) (Zhenhuan Lu);

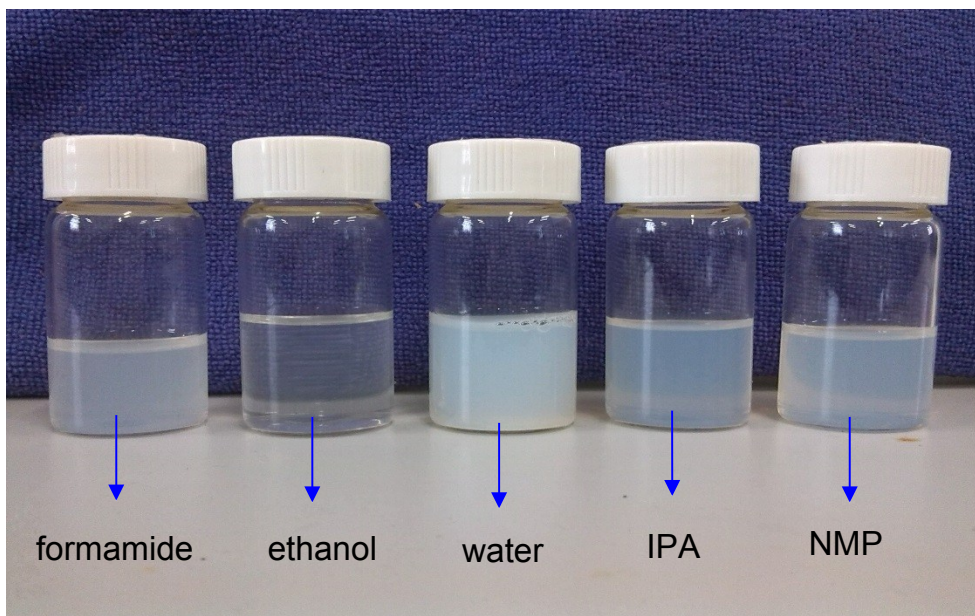

Fig. S1. Photographs of the dispersions of g-C<sub>3</sub>N<sub>4</sub> nanosheets in different of solvents.

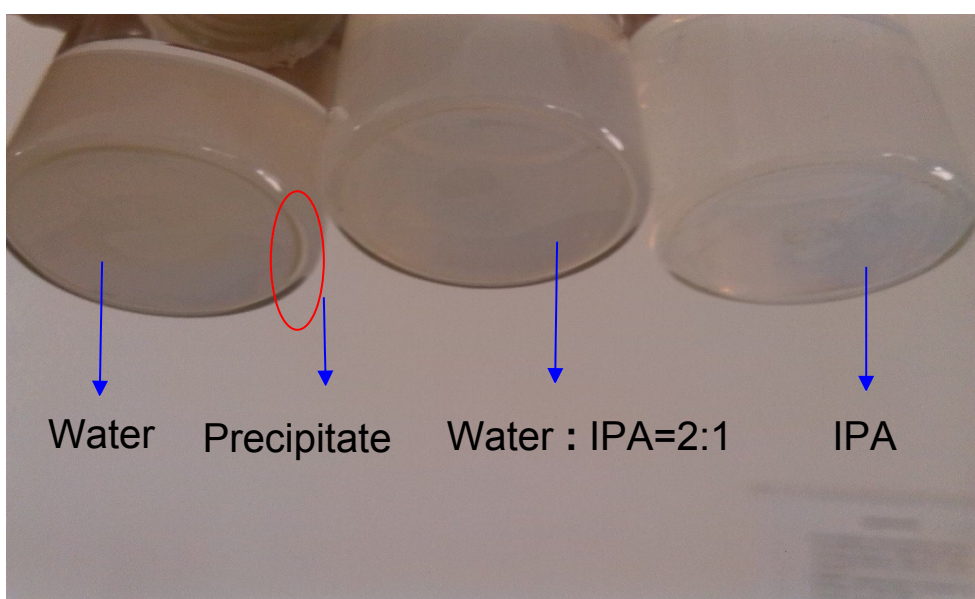

Fig. S2 The stability of the dispersions of g-C<sub>3</sub>N<sub>4</sub> nanosheets in various solvents of water, IPA, and the mixture of water and IPA.

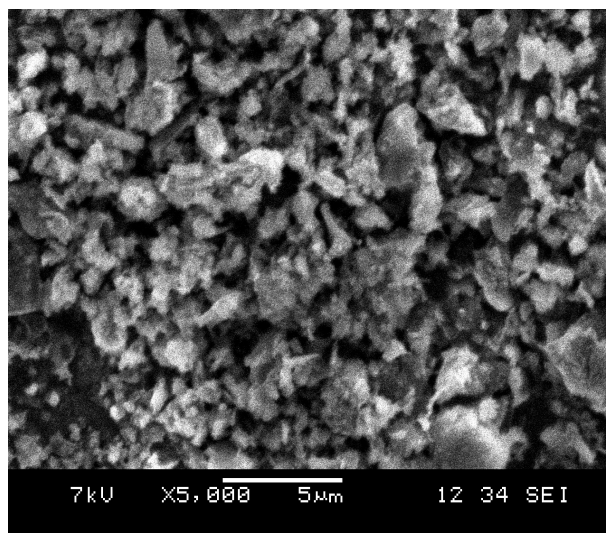

Fig.S3 SEM images of bulk g-C<sub>3</sub>N<sub>4</sub>.
